# Supplementary material for: The effectiveness of treatment with probiotics inHelicobacter pylorieradication: results from an umbrella meta-analysis on meta-analyses of randomized controlled trials
Source: Royal Society of Chemistry journal article supplement (doi:10.1039/d3fo00300k), 2023-01-01
Supplement: d3fo00300k1.pdf [file d3fo00300k1.pdf]

**Supplementary Table 1:** Results of assess the methodological quality of meta-analysis.

| Study                 | Q1 <sup>1</sup> | Q2          | Q3  | Q4          | Q5  | Q6  | Q7          | Q8          | Q9  | Q10 | Q11 | Q12 | Q13 | Q14 | Q15 | Q16 | Quality assessment |
|-----------------------|-----------------|-------------|-----|-------------|-----|-----|-------------|-------------|-----|-----|-----|-----|-----|-----|-----|-----|--------------------|
| Zhou et al. 2019      | No              | Yes         | No  | Partial Yes | Yes | Yes | No          | Yes         | Yes | No  | Yes | Yes | Yes | Yes | Yes | Yes | Moderate           |
| Zheng et al. 2013     | No              | Yes         | Yes | Partial Yes | No  | Yes | Partial Yes | Yes         | Yes | No  | Yes | Yes | No  | No  | Yes | No  | Moderate           |
| Szajewska et al. 2010 | No              | Partial Yes | Yes | Partial Yes | No  | Yes | Partial Yes | Yes         | Yes | Yes | Yes | Yes | Yes | No  | Yes | Yes | Moderate           |
| Szajewska et al. 2015 | No              | Partial Yes | Yes | Yes         | Yes | Yes | Yes         | Yes         | Yes | Yes | Yes | Yes | Yes | No  | Yes | Yes | High               |
| Szajewska et al. 2015 | No              | Yes         | Yes | Partial Yes | Yes | Yes | No          | Partial Yes | Yes | Yes | Yes | Yes | No  | Yes | Yes | Yes | Moderate           |
| Yu et al. 2019        | No              | Partial Yes | No  | Partial Yes | Yes | Yes | No          | Yes         | Yes | No  | Yes | Yes | Yes | No  | Yes | No  | Moderate           |
| Zhang et al. 2015     | No              | Partial Yes | Yes | Partial Yes | No  | Yes | No          | Yes         | Yes | No  | Yes | Yes | Yes | No  | Yes | No  | Moderate           |
| McFarland et al. 2015 | No              | Partial Yes | No  | Yes         | Yes | Yes | No          | Yes         | Yes | No  | Yes | Yes | Yes | Yes | Yes | Yes | Moderate           |
| Muhan Lu et al. 2016  | No              | Yes         | Yes | Yes         | Yes | Yes | Partial Yes | No          | Yes | No  | Yes | Yes | No  | Yes | No  | No  | Moderate           |
| McFarland et al. 2016 | No              | Partial Yes | No  | Partial Yes | Yes | Yes | No          | Yes         | Yes | No  | Yes | Yes | Yes | Yes | Yes | Yes | Moderate           |
| Dang et al. 2014      | No              | Partial Yes | Yes | Partial Yes | Yes | Yes | Yes         | Yes         | Yes | No  | Yes | Yes | No  | Yes | No  | No  | Moderate           |
| Lau et al. 2016       | No              | Partial Yes | Yes | Partial Yes | Yes | Yes | No          | Yes         | No  | No  | Yes | No  | No  | No  | Yes | Yes | Moderate           |
| ZHIFA et al. 2015     | No              | Partial Yes | Yes | Partial Yes | Yes | Yes | Partial Yes | Yes         | Yes | No  | Yes | Yes | Yes | No  | No  | Yes | Moderate           |

|                     |    |             |     |     |     |     |             |     |     |     |     |     |     |     |     |     |     |      |
|---------------------|----|-------------|-----|-----|-----|-----|-------------|-----|-----|-----|-----|-----|-----|-----|-----|-----|-----|------|
| Sachdeva et al.2009 | No | Partial Yes | Yes | Yes | Yes | Yes | Partial Yes | High |
| Tong et al.2007     | No | Partial Yes | Yes | Yes | Yes | Yes | Partial Yes | No  | High |
| Zhang et al.2020    | No | Partial Yes | Yes | Yes | Yes | Yes | Partial Yes | No  | High |
| Gong et al.2015     | No | Partial Yes | Yes | Yes | Yes | Yes | Partial Yes | High |
| Wang et al. 2013    | No | Partial Yes | Yes | Yes | Yes | Yes | Partial Yes | Yes | Yes | No  | Yes | Yes | Yes | Yes | Yes | Yes | No  | High |

\* 1. Did the research questions and inclusion criteria for the review include the components of PICO? 2. Did the report of the review contain an explicit statement that the review methods were established prior to the conduct of the review and did the report justify any significant deviations from the protocol? 3. Did the review authors explain their selection of the study designs for inclusion in the review? 4. Did the review authors use a comprehensive literature search strategy? 5. Did the review authors perform study selection in duplicate? 6. Did the review authors perform data extraction in duplicate? 7. Did the review authors provide a list of excluded studies and justify the exclusions? 8. Did the review authors describe the included studies in adequate detail? 9. Did the review authors use a satisfactory technique for assessing the risk of bias (RoB) in individual studies that were included in the review? 10. Did the review authors report on the sources of funding for the studies included in the review? 11. If meta-analysis was performed, did the review authors use appropriate methods for statistical combination of results? 12. If meta-analysis was performed, did the review authors assess the potential impact of RoB in individual studies on the results of the meta-analysis or other evidence synthesis? 13. Did the review authors account for RoB in individual studies when interpreting/ discussing the results of the review? 14. Did the review authors provide a satisfactory explanation for, and discussion of, any heterogeneity observed in the results of the review? 15. If they performed quantitative synthesis, did the review authors carry out an adequate investigation of publication bias (small study bias) and discuss its likely impact on the results of the review? 16. Did the review authors report any potential sources of conflict of interest, including any funding they received for conducting the review?

Each question was answered with "Yes", "Partial Yes" or "No". When no meta-analysis was done, question 11, 12 and 15 were answered with "No meta-analysis conducted"
